# Supplementary material for: Coitus-Free Sexual Transmission of Zika Virus in a Mouse Model
Source: PubMed Central journal article supplement (PMC6194026; doi:10.1038/s41598-018-33528-2), 2018-10-18
Supplement: 41598_2018_33528_MOESM1_ESM.pdf [file 41598_2018_33528_MOESM1_ESM.pdf]

Supplementary Data

**Coitus-Free Sexual Transmission of Zika Virus in a Mouse Model**

Chad S. Clancy<sup>1,2</sup>, Arnaud J. Van Wettere<sup>1</sup>, John D. Morrey<sup>2</sup>, Justin G. Julander<sup>2</sup>

<sup>1</sup>Utah Veterinary Diagnostic Laboratory, School of Veterinary Medicine, Department of Animal, Dairy, and Veterinary Sciences, Utah State University, Logan, Utah, United States of America

<sup>2</sup>Institute for Antiviral Research, Department of Animal, Dairy, and Veterinary Sciences, Utah State University, Logan, Utah, 84322-5600, United States of America

| Supplemental Table 1. Histopathology Severity Score of Male Reproductive Tissue |            |            |            |           |            |           |            |          |            |          |
|---------------------------------------------------------------------------------|------------|------------|------------|-----------|------------|-----------|------------|----------|------------|----------|
| Treatment                                                                       | Negative   |            | Minimal    |           | Mild       |           | Moderate   |          | Severe     |          |
|                                                                                 | Epididymis | Testicle   | Epididymis | Testicle  | Epididymis | Testicle  | Epididymis | Testicle | Epididymis | Testicle |
| One<br>(EF+/SP+)                                                                | 0% (0/3)   | 33% (1/3)  | 33% (1/3)  | 33% (1/3) | 66% (2/3)  | 33% (1/3) | 0% (0/3)   | 0% (0/3) | 0% (0/3)   | 0% (0/3) |
| Two<br>(EF+/SP-)                                                                | 0% (0/3)   | 66% (2/3)  | 66% (2/3)  | 33% (1/3) | 33% (1/3)  | 0% (0/3)  | 0% (0/3)   | 0% (0/3) | 0% (0/3)   | 0% (0/3) |
| Three<br>(EF-/SP+)                                                              | 100% (3/3) | 100% (3/3) | 0% (0/3)   | 0% (0/3)  | 0% (0/3)   | 0% (0/3)  | 0% (0/3)   | 0% (0/3) | 0% (0/3)   | 0% (0/3) |
| Four<br>(EF-/SP-;<br>Spike)                                                     | 100% (2/2) | 100% (2/2) | 0% (0/2)   | 0% (0/2)  | 0% (0/2)   | 0% (0/2)  | 0% (0/2)   | 0% (0/2) | 0% (0/2)   | 0% (0/2) |
| Six<br>(EF-/SP-)                                                                | 100% (1/1) | 100% (1/1) | 0% (0/1)   | 0% (0/1)  | 0% (0/1)   | 0% (0/1)  | 0% (0/1)   | 0% (0/1) | 0% (0/1)   | 0% (0/1) |

**Supplemental Table 1.** The lesion severity of the testicle and epididymis. Lesions in both the testicle and epididymis at 7 days post infection were minimal to mild in all infected males. Inflammation was not observed in sham-infected males. EF= epididymal flush; SP= seminal plasma; += Zika virus infected; -= Sham.

| <b>Supplemental Table 2. Effect of Estrous Cycle on Female Early Euthanasia</b> |                      |               |                  |                 |
|---------------------------------------------------------------------------------|----------------------|---------------|------------------|-----------------|
| <b>Hormone</b>                                                                  | <b>Estrous Cycle</b> |               |                  |                 |
| <b>Treatment</b>                                                                | <b>Proestrus</b>     | <b>Estrus</b> | <b>Metestrus</b> | <b>Diestrus</b> |
| <b>Progesterone</b>                                                             | 39.1% (9/23)         | 8.7% (2/23)   | 8.7% (2/23)      | 43.5% (10/23)   |
| <b>Sham Treatment</b>                                                           | 0% (0/0)             | 0% (0/0)      | 0% (0/0)         | 0% (0/0)        |

| <b>Supplemental Table 3. Effect of Estrous Cycle on Female Survival</b> |                      |               |                  |                 |
|-------------------------------------------------------------------------|----------------------|---------------|------------------|-----------------|
| <b>Hormone</b>                                                          | <b>Estrous Cycle</b> |               |                  |                 |
| <b>Treatment</b>                                                        | <b>Proestrus</b>     | <b>Estrus</b> | <b>Metestrus</b> | <b>Diestrus</b> |
| <b>Progesterone</b>                                                     | 26.7% (8/30)         | 6.7% (2/30)   | 6.7% (2/30)      | 60% (18/30)     |
| <b>Sham Treatment</b>                                                   | 0% (0/10)            | 50% (5/10)    | 10% (1/10)       | 40% (4/10)      |
